# *Sesn-1* is required for lifespan extension during caloric deprivation in *C. elegans* through inhibition of mTORC1 and activation of autophagy

Andrei O. Zheltukhin<sup>1</sup>, Peter M. Chumakov<sup>1</sup>, Andrei V. Budanov<sup>2,1,3</sup>

<sup>1</sup>Engelhardt Institute of Molecular Biology, Russian Academy of Sciences, Moscow, Russia

<sup>2</sup>School of Biochemistry and Immunology, Trinity Biomedical Sciences Institute, Trinity College Dublin, Dublin 2, Ireland

<sup>3</sup>Shemyakin-Ovchinnikov Institute of Bioorganic Chemistry of the Russian Academy of Sciences, Moscow, Russia

**Correspondence to:** Peter M. Chumakov, Andrei V. Budanov; **email:** [chumakovpm@yahoo.com](mailto:chumakovpm@yahoo.com), <https://orcid.org/0000-0002-8078-2908>; [budanova@tcd.ie](mailto:budanova@tcd.ie)

**Keywords:** *sesn-1*, mTOR, autophagy, aging

**Received:** November 20, 2024

**Accepted:** June 30, 2025

**Published:** July 28, 2025

**Copyright:** © 2025 Zheltukhin et al. This is an open access article distributed under the terms of the [Creative Commons Attribution License](https://creativecommons.org/licenses/by/4.0/) (CC BY 4.0), which permits unrestricted use, distribution, and reproduction in any medium, provided the original author and source are credited.

## ABSTRACT

Sestrins, evolutionarily conserved stress-responsive proteins, are increasingly recognized for their potential role in lifespan regulation. This study aimed to elucidate the influence of the *sesn-1* gene on lifespan modulation during caloric deprivation (CD) in the model organism *C. elegans*. Our findings reveal that *sesn-1* mediates lifespan extension under CD, primarily through the repression of mTORC1 kinase and activation of autophagy. Moreover, we identified an essential role for *sesn-1* in enhancing stress resilience in nematodes, particularly in the context of nutrient sensing. Further investigations demonstrated *sesn-1*'s interaction with the GATOR2 protein complex, its role in maintaining muscle integrity and a potential synergy between *sesn-1* and the FOXO pathway. Overall, our research underscores the profound implications of Sestrins in aging and stress resistance, shedding light on possible therapeutic avenues for prevention and treatment of age-associated disorders.

## INTRODUCTION

Sestrins were identified two decades ago as stress-responsive proteins that play an important role in regulating cellular homeostasis. Vertebrate genomes showcase three Sestrin genes (*SESN1-3*), while invertebrates feature just one [1–3]. Numerous stressors, ranging from hypoxia and oxidative stress to DNA damage and nutrient deprivation, induce Sestrin expression in mammalian cells. The orchestration behind this expression involves several transcription factors, notably p53, FOXO, ATF4 and NRF2 [4–6]. Highlighting evolutionary conservation [7], the same signalling pathways trigger the activation of *dSesn* in *D. melanogaster* [8]. Consequently, Sestrins play pivotal roles in the regulation of cellular viability under various stress conditions, such as hypoxia,

oxidative stress, DNA damage and glucose deprivation [2, 9–13].

Earlier research from our team established Sestrins as antioxidant proteins that play a critical role in inhibiting the mechanistic target of rapamycin complex 1 (mTORC1) kinase [9, 14–16]. mTORC1 is an intricate environmental sensor that integrates signals from nutrients, growth factors and stresses to regulate cell fate decisions. mTORC1 functions as a central regulator of biosynthesis and cell growth, while also suppressing macroautophagy (herein in the text – autophagy) [17]. Autophagy is the process of encapsulating intracellular components into autophagosomal vesicles, followed by the degradation of their contents in lysosomes. Autophagy is essential for nutrient supply and cell repair under stressful conditions. While autophagy

typically supports cell survival under stress, it can also trigger autophagy-dependent cell death [18].

Remarkably, mTORC1 plays a key role in lifespan and aging regulation across various species. Application of specific mTORC1 inhibitors, like rapamycin, has been shown to enhance lifespan in different organisms from yeast to mice [19–23]. Similarly, caloric restriction (CR), a well-documented longevity enhancer across many species, also represses mTORC1 activity, further cementing the role of this kinase in aging control [24–26]. Nutrient and energy availability signals are transmitted to mTORC1 through the evolutionarily conserved insulin/IGF1 signaling pathway in metazoans [27]. In addition to mTORC1, the insulin/IGF1 signalling pathway inhibits the forkhead box O (*FoxO*) transcription factors via Akt-mediated phosphorylation and nuclear exclusion [28], and FoxOs regulate adaptation to starvation conditions in metazoans [29, 30]. In contrast, mTORC1 is activated by Akt in response to insulin/IGF-1 signaling and promotes anabolic processes while inhibiting catabolic pathways [31].

Branched-chain amino acids (BCAA), especially leucine, play a critical role in the regulation of mTORC1, primarily via activation of the GATOR2 protein complex. GATOR2 is an inhibitor of the GATOR1 protein complex, which suppresses the activity of RagA/B GTPases, thereby preventing mTORC1 translocation to lysosomes and its activation [17]. Sestrins inhibit mTORC1 through the interaction with GATOR2. Leucine binding to Sestrins induces conformational changes that weaken the interaction between Sestrins and GATOR2, leading to mTORC1 activation [32, 33].

Being regulators of stress response and metabolism, broader implications of Sestrins in aging control cannot be understated. In *C. elegans*, variations in *sesn-1* expression levels have measurable effects on lifespan and physiological functions [34, 35]. Similarly, in *D. melanogaster*, alterations in dSesn levels contribute to the development of age-associated disorders such as muscle degeneration and cardiac arrhythmia [8]. Many of Sestrin's effects might be attributed to its role in activating autophagy through the mTORC1-mediated mechanism. Recent findings indicate that dSesn plays a key role in extending lifespan in flies subjected to BCAA restriction [36]. Stem cell functionality is maintained through autophagy [37] and the impact of Sestrins on various facets of stem cell biology, encompassing both stemness and differentiation, is also being recognized [38].

In an effort to elucidate overarching role of Sestrins in lifespan modulation during caloric deprivation (CD),

we utilized a *C. elegans* model in which *sesn-1* was inactivated via gene deletion [35]. Existing research has underscored the remarkable lifespan extension in nematodes upon CD [39, 40]. Our studies aimed to elucidate Sestrin's role in lifespan regulation under CD and to examine how *sesn-1* deficient worms respond to stress. Based on our studies in *C. elegans*, we demonstrate that the relationship between *sesn-1* and the GATOR–TORC1–autophagy axis is highly conserved across eukaryotes [7]. We investigated the involvement of *sesn-1* in signalling pathways that link mTORC1 activity, autophagy and increased lifespan during CD in *C. elegans*, such as those regulated by *let-363* (an ortholog of the mammalian *mTOR* gene) [41], *daf-2* (an ortholog of the mammalian *IGF1* gene) [42] and *daf-16* (an ortholog of the mammalian *FOXO* genes) [42]. We also evaluated the potential involvement of *sesn-1* in lifespan extension in nematodes carrying a deletion in the *eat-2* gene [43] that is required for proper pharyngeal function. Animals carrying this mutation experience continuous, moderate caloric restriction throughout development and adulthood. Our findings confirm the critical role of *sesn-1* in lifespan extension mediated by mTORC1 inhibition and autophagy activation in response to CD.

## RESULTS

### *Sesn-1* modulates lifespan extension in *C. elegans*

To understand the role of *sesn-1*, the nematode ortholog of the Sestrin genes, in the control of aging and lifespan, we determined its impact on lifespan regulation under CD conditions. Using established protocols [40], nematodes were cultured on agar plates with (control) or without bacteria to assess lifespan. As previously reported [34], *sesn1*-deletion mutant strain, *sesn-1(ok3157)*, exhibited a marginally reduced lifespan compared to their wild-type (WT) counterparts under normal conditions. This suggests that *sesn-1* facilitates nematode homeostasis in food-abundant conditions. However, in our observations, the lifespan of the *sesn-1(ok3157)* animals did not differ from that of the WT counterparts under *ad libitum* conditions (Figure 1 and Table 1). Therefore, we decided to examine the role of *sesn-1* in the regulation of lifespan in response to CD. According to our data, CD augmented the lifespan of WT animals by 40.2%. In contrast, the *sesn-1(ok3157)* worms experienced a mere 6.2% increase in lifespan, underscoring the pivotal role of *sesn-1* in lifespan extension following CD exposure (Figure 1 and Table 1). The same data were observed in another *sesn-1* deficient strain, *sesn-1(ie24589)* (IE24589 strain with MOS-1 transposon insertion in 3 exon) (Supplementary Figure 1).

**Table 1. Lifespan extension means analysis for control WT and *sesn-1(ok3157)* nematodes under caloric deprivation, with RNAi expression against *npp-18* and *Y32H12A.8*.**

| Strain                | RNAi             | Control mean lifespan<br>± SEM, days | n  | Starvation mean<br>lifespan ± SEM, days | n  | Effect vs.<br>control % | p-value vs.<br>control |
|-----------------------|------------------|--------------------------------------|----|-----------------------------------------|----|-------------------------|------------------------|
| WT                    | EV               | 18,1 ± 0,50                          | 46 | 24,5 ± 0,61                             | 57 | + 40,2%                 | <0,0001                |
| <i>sesn-1(ok3157)</i> | EV               | 17,6 ± 0,52                          | 49 | 18,8 ± 0,6                              | 57 | + 6,19%                 | 0,8242                 |
| WT                    | <i>npp-18</i>    | 17,5 ± 0,47                          | 52 | 18,3 ± 0,58                             | 49 | + 4,38%                 | >0,9999                |
| <i>sesn-1(ok3157)</i> | <i>npp-18</i>    | 16,7 ± 0,44                          | 51 | 17,3 ± 0,54                             | 52 | + 3,95%                 | >0,9999                |
| WT                    | <i>Y32H12A.8</i> | 17,1 ± 0,59                          | 50 | 17,8 ± 0,71                             | 46 | + 3,5%                  | >0,9999                |
| <i>sesn-1(ok3157)</i> | <i>Y32H12A.8</i> | 16,5 ± 0,53                          | 50 | 16,5 ± 0,45                             | 44 | + 0,12%                 | >0,9999                |

***Sesn-1* protects nematodes from multiple stresses**

Given the link between stress response and lifespan modulation, where proteins responsive to stress curb accumulation of age-linked damage, we investigated how *sesn-1* influences stress tolerance. Exposing nematodes to various stressors like oxidizing agents (paraquat and hydrogen peroxide) and axenic culture medium (M9) revealed stark differences between WT and *sesn-1(ok3157)* or *sesn-1(ie24589)* animals. When WT first larval stage (L1) nematodes were placed in M9 medium, they outlived their *sesn-1(ok3157)* or *sesn-1(ie24589)* congeners, showing reduced resistance of *sesn-1* mutants to nutrient restriction (Figure 2A). Furthermore, oxidative stress induced by paraquat and H<sub>2</sub>O<sub>2</sub> dramatically accelerated the death of *sesn-1(ok3157)* and *sesn-1(ie24589)* worms compared to

their WT counterparts (Figure 2B, 2C). These collective findings emphasize the role of *sesn-1* in bolstering stress resilience in nematodes, likely through mechanisms analogous to those that promote lifespan extension during CD.

***Sesn-1*: an essential component for autophagy activation**

Autophagy, a mechanism that promotes lifespan extension during nutrient scarcity and augments stress resistance [44, 45], may be activated by *sesn-1*. To test this hypothesis, we utilized a *C. elegans* strain *adls2122* that expresses a GFP-tagged LGG-1 fusion protein (LGG-1::GFP), where LGG-1 is the nematode ortholog of the mammalian autophagy marker LC3. Autophagosomes incorporating LGG-1::GFP form

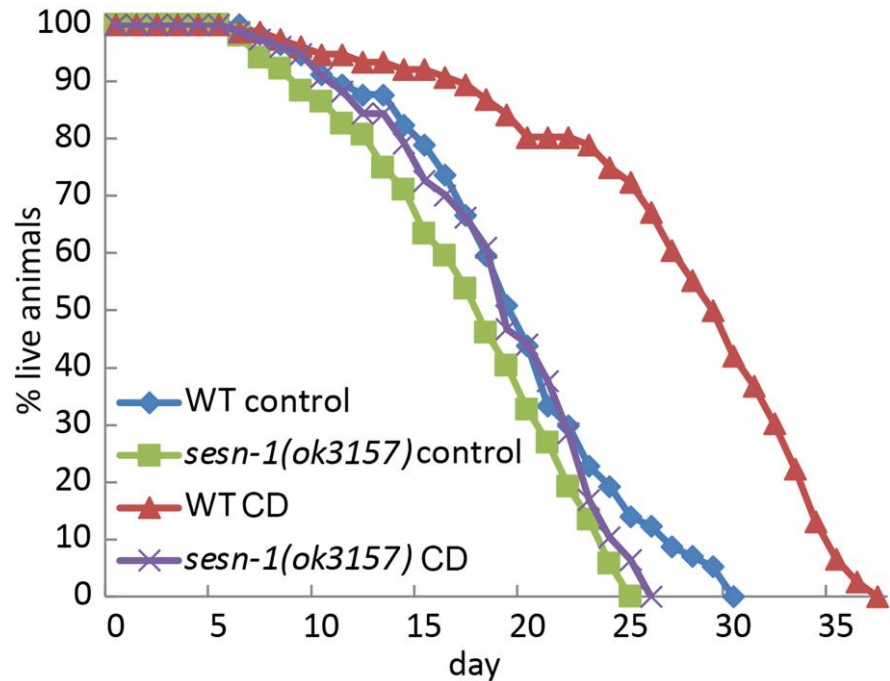

**Figure 1. *C. elegans* lifespan extension under CD is modulated by *sesn-1*.** The lifespan of WT and *sesn-1(ok3157)* nematodes was assessed after plating on control or axenic media.

discrete GFP-positive vesicles, which can be readily visualized by fluorescence microscopy. [46]. In WT third larval stage (L3) nematodes subjected to CD, we observed a pronounced accumulation of LGG-1::GFP-labeled autophagosomes within the seam cells. In contrast, nematodes with *sesn-1* silenced by RNAi (*sesn-1(RNAi)*) exhibited only a modest increase in LGG-1::GFP-labeled autophagosomes, emphasizing *sesn-1*'s crucial role in autophagy initiation during starvation. Under control conditions, WT animals exhibited an average of 0.38 autophagosomes per cell

compared to just 0.14 autophagosomes per cell in *sesn-1* mutants—a difference of more than two-fold, which was statistically significant ( $p = 0.02194$ ) (Figure 3A). In mammals, Sestrin-dependent autophagy activation is mediated by mTORC1 inhibition [6]. To ascertain *sesn-1*'s role in autophagy during nematode starvation, we subjected both WT and *sesn-1(RNAi)* worms to CD and evaluated mTORC1 activity and autophagy levels using immunoblotting. While the control group exhibited reduced ribosomal protein S6 phosphorylation post-CD exposure — an mTORC1-inhibiting event — this

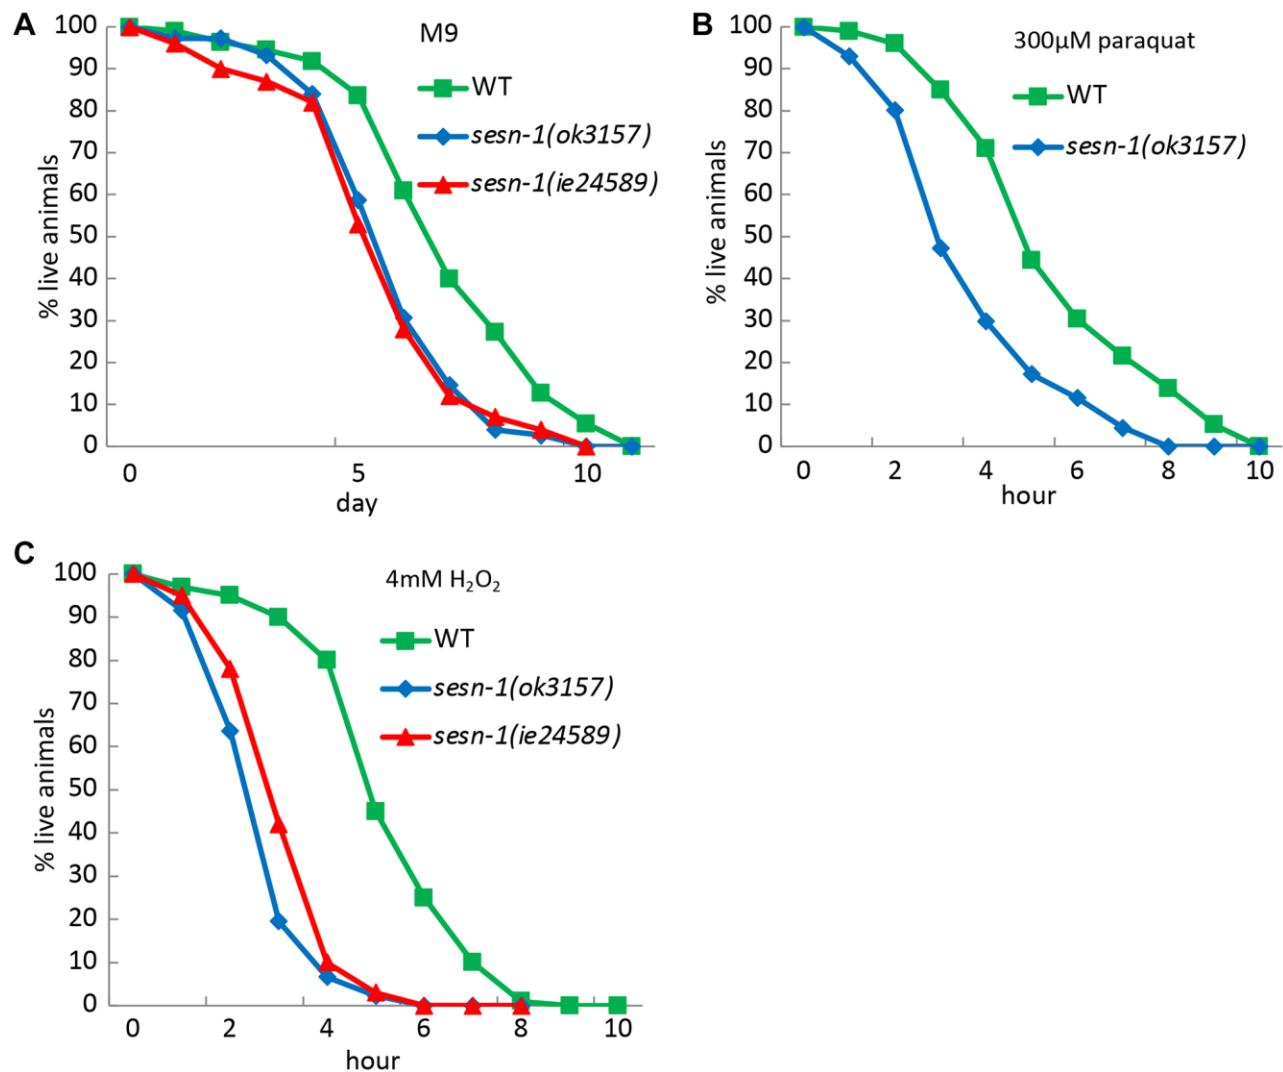

**Figure 2. Role of *Sesn-1* in stress resistance.** The viability of WT and *sesn-1(ok3157)* *C. elegans* was studied under various stress conditions. (A) In axenic M9 medium ( $n = 783$  for WT,  $n = 437$  for *sesn-1(ok3157)*,  $n = 511$  for *sesn-1(ie24589)*), the mean survival rates for *sesn-1(ok3157)* and *sesn-1(ie24589)* were  $6.13 \pm 0.4$  and  $6.16 \pm 0.3$  days, respectively, compared to  $7.9 \pm 0.5$  days for WT. The difference between *sesn-1(ok3157)* and *sesn-1(ie24589)* was not significant ( $P > 0.05$ ), while both mutants showed significantly lower survival than WT ( $P < 0.001$ ). (B) In the presence of  $300 \mu\text{M}$  paraquat ( $n = 1103$  for WT,  $n = 876$  for *sesn-1(ok3157)*,  $n = 882$  for *sesn-1(ie24589)*), the mean survival rates were  $4.1 \pm 1.2$  and  $4.0 \pm 0.9$  hours for *sesn-1(ok3157)* and *sesn-1(ie24589)*, respectively, compared to  $5.8 \pm 1.2$  hours for WT. Again, the difference between the two *sesn-1* mutants was not significant ( $P > 0.05$ ), while both were significantly more sensitive than WT ( $P < 0.001$ ). (C) In the presence of  $4 \text{ mM H}_2\text{O}_2$  ( $n = 1301$  for WT,  $n = 930$  for *sesn-1(ok3157)*,  $n = 827$  for *sesn-1(ie24589)*), the mean survival rates were  $3.3 \pm 0.5$  and  $3.8 \pm 0.6$  hours for *sesn-1(ok3157)* and *sesn-1(ie24589)*, respectively, compared to  $6.4 \pm 0.8$  hours for WT. The difference between *sesn-1(ok3157)* and *sesn-1(ie24589)* was not statistically significant ( $P > 0.05$ ), while both mutants showed significantly reduced survival compared to WT ( $P < 0.001$ ). Data are presented as mean  $\pm$  S.E.M.



reduction was not observed in *sesn-1(RNAi)* animals (Figure 3B). Evaluation of autophagy by comparing LGG-1::GFP with its pro-autophagic, phosphatidylethanolamine-conjugated form (LGG-1::GFP-PE) revealed that CD prompted substantial accumulation of LGG-1::GFP-PE in WT worms. Yet, *sesn-1(RNAi)* worms exhibited only a minor increase in this autophagosome marker post-starvation, again highlighting *sesn-1*'s indispensable role in autophagy modulation under CD in *C. elegans* (Figure 3B). In a bid to elucidate *sesn-1* contribution to autophagosome formation, we evaluated LGG-1::GFP-PE formation intensity in worms pre-treated with 200 mM chloroquine for 24 hours [47, 48]. Under acute starvation, WT worms manifested pronounced LGG-1::GFP-PE accumulation, but this was notably suppressed in *sesn-1(RNAi)* worms, signifying *sesn-1*'s necessity for appropriate autophagy activation (Supplementary Figure 2).

### Role of *Sesn-1* role in sustaining muscle integrity

Previous studies in *D. melanogaster* and mice have linked Sestrins to preservation of muscle function,

primarily through their role in mitigating oxidative stress-induced damage [8, 38, 49]. To investigate *sesn-1*'s potential role in preserving muscle density in *C. elegans*, we utilized a nematode strain (*ccls4251 I, el282 IV*) expressing *myo-3p::GFP* NLS-tagged fusion protein, which labels myocyte nuclei. Assessment of muscle density across various developmental stages, particularly the fourth larval stage (L4) and 5-day-old adult stage, in WT and *sesn-1(RNAi)* animals revealed that muscle density was consistent in the L4 animals across the groups. However, a pronounced reduction in myocyte count was observed in 5-day-old *sesn-1(RNAi)* adult worms, highlighting the essential role of *sesn-1* in maintaining adult muscle function (Figure 3C).

### *Sesn-1* facilitates lifespan extension through GATOR2

Previous studies in mammalian cells have shown that Sestrins suppress mTORC1 activity by inhibiting GATOR2 [32, 50]. The Sestrin-GATOR-mTORC1 signalling pathway is known to be conserved in eukaryotes [7], so we analysed the potential involve-

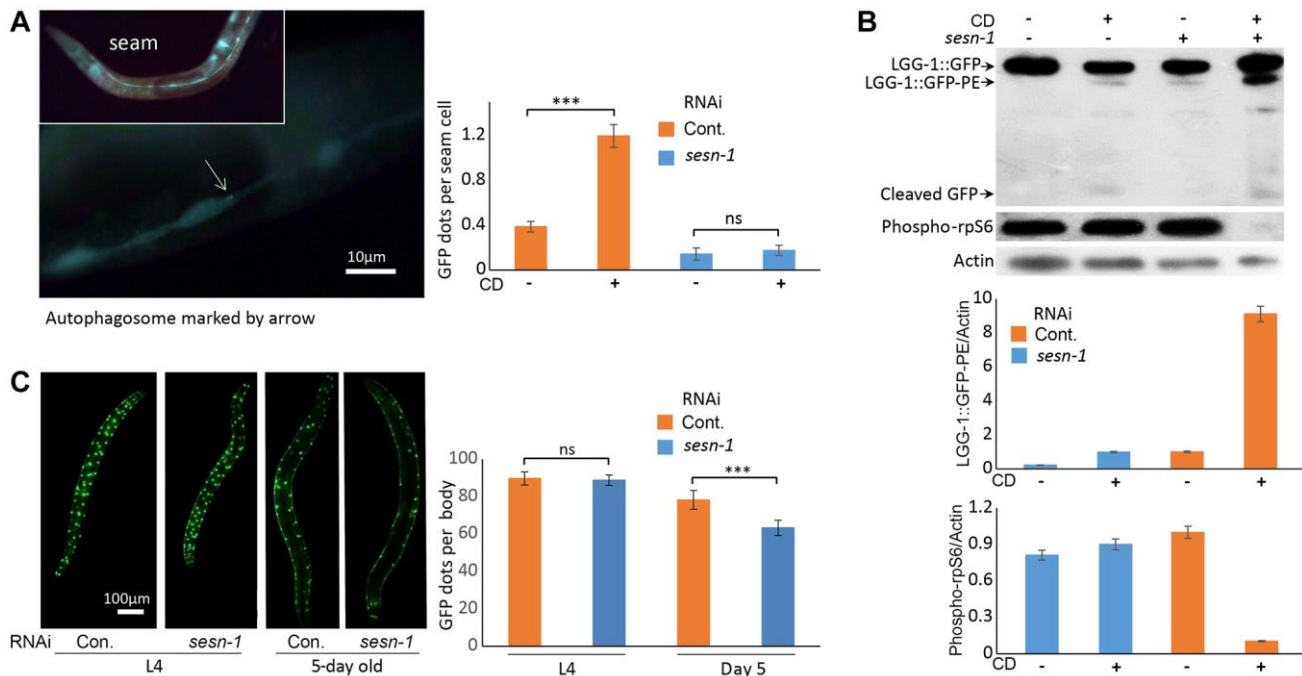

**Figure 3. Autophagy activation by *sesn-1* under CD correlates with reduced muscle degeneration.** (A) Autophagosome accumulation in seam cells. Both control *adIs2122* (DA2123 strain) and *adIs2122; sesn-1(RNAi)* nematodes, expressing a GFP-tagged LGG-1 fusion protein during L3, were exposed to axenic medium. Autophagosome counts per seam cell were analyzed under control conditions ( $n = 137$  for *adIs2122*,  $n = 56$  for *adIs2122; sesn-1(RNAi)*) and starvation conditions ( $n = 117$  for *adIs2122*,  $n = 80$  for *adIs2122; sesn-1(RNAi)*). "ns" and "\*\*\*\*" indicate  $P$ -values  $> 0.05$  and  $< 0.001$ , respectively. All bar graphs are presented as mean  $\pm$  S.E.M. (B) Immunoblot and densitometric analyses showing relative levels of GFP::LGG-1, its phosphatidylethanolamine-conjugated form (LGG-1::GFP-PE), and the phosphorylated form of ribosomal protein S6 (phospho-rpS6) in *adIs2122* (DA2123 strain) and *adIs2122; sesn-1(RNAi)* worms. All bar graphs represent blot intensity normalized to actin. (C) Whole-body images of nematodes expressing a *myo-3p::GFP* NLS-tagged fusion protein in body wall muscle nuclei in the *ccls4251* (PD4251 strain). Nuclear counts were performed at L4 ( $n = 24$  for *ccls4251* and  $n = 23$  for *ccls4251; sesn-1(RNAi)*) and at 5 days of adulthood ( $n = 20$  for both groups). "ns" and "\*\*\*\*" indicate  $P$ -values  $> 0.05$  and  $< 0.001$ , respectively. All bar graphs are presented as mean  $\pm$  S.E.M.

ment of GATOR2 in the *sesn-1*-modulated lifespan extension. We proposed that if *sesn-1*'s effects on the lifespan extension are GATOR2-dependent, *sesn-1* would not significantly influence lifespan in GATOR2-deficient worms under CD. To test this, we used RNAi to silence the genes encoding the major components of GATOR2: *npp-18* and *Y32H12A.8*, the orthologs of the mammalian *SEH1L* and *WDR24* genes, respectively, in WT and *sesn-1(ok3157)* nematodes (Figure 4A, 4B) and measured lifespan increase during CD. While *sesn-1* facilitated lifespan extension during CD in control worms, its effects were notably diminished when *npp-18* and *Y32H12A.8* were suppressed (Figure 4A, 4B and Table 1). Further studies examining *sesn-1*'s role in autophagy regulation in worms with suppressed GATOR2, using immunoblotting, revealed intriguing findings. In the absence of *sesn-1*, worms still exhibited modest autophagy; however, simultaneous RNAi-mediated suppression of *sesn-1* and *npp-18* significantly reduced autophagy. This suggests that *sesn-1* likely operates via *npp-18* (Figure 5).

#### ***Sesn-1* supports lifespan extension via FOXO and in *eat-2* mutants**

*Sesn-1* may be involved in the signaling pathways known to be controlled by CD in *C. elegans*, such as those regulated by *let-363(TOR)* [41, 51], *daf-2(IGF1R)* [42] and *daf-16(FOXO)* [42]. We also tested the possible involvement of *sesn-1* in lifespan extension in nematodes with a deletion in the *eat-2 (ad1116)* gene [43]. We used nematode strains with knockouts of *eat-2(ad1116)*,

*daf-2(e1370)* and *daf-16(mu86)* either with or without *sesn-1* silencing by RNAi. The contribution of *sesn-1* to the FOXO pathway and lifespan extension in *eat-2(ad1116)* nematodes was appreciable but did not reach statistical significance (Figure 6A–6D and Table 2). Without *daf-16* and *sesn-1*, the lifespan of starved worms is reduced by 9.5% (Figure 6C), whereas the presence of *sesn-1* increases lifespan of *daf-16(mu86)* worms by 7.5% under CD conditions. Survival of the *eat-2* worms under CD requires sufficient autophagic activity. In starved nematodes lacking both *eat-2* and *sesn-1*, lifespan increased by 3.6%, whereas the presence of *sesn-1* extended the lifespan of *eat-2(ad1116)* mutants by 11% (Figure 6D and Table 2).

## **DISCUSSION**

Aging is one of humanity's most pressing challenges, exacerbated by the global rise in life expectancy and the parallel increase in age-related diseases such as cancer, diabetes and neurodegenerative disorders. Understanding the complexities of aging is crucial for mitigating its adverse effects on human well-being and ensuring healthy aging. Notably, the key signaling pathways that govern aging are evolutionary conserved. Model organisms like *C. elegans* serve as indispensable tools for unravelling the molecular mechanisms underlying aging. CR has emerged as a key physiological intervention that extends both lifespan and healthspan across a wide range of eukaryotic species. In nematodes, CR as well as CD mimic the lifespan-extending effects observed in worms with the *eat-2(ad1116)* mutation, which significantly restricts

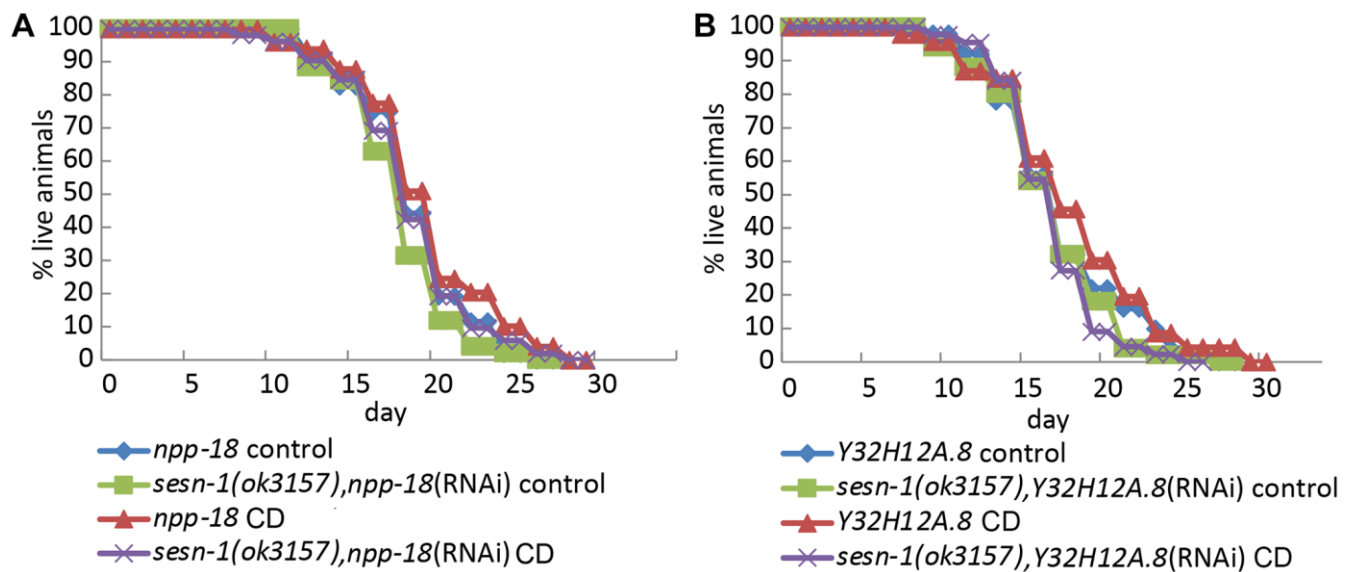

**Figure 4. *Sesn-1* modulates longevity under CD via GATOR2.** (A) Lifespan of WT and *sesn-1(ok3157)* worms subjected to *npp-18* RNAi knockdown in *ad libitum* and axenic media. (B) Lifespan of WT and *sesn-1(ok3157)* nematodes subjected to *Y32H12A.8* RNAi knockdown in *ad libitum* and axenic media.

food intake [43]. Interestingly, overlaying CD and CR on *eat-2* mutants does not further enhance this lifespan extension (Figure 6D and Table 2), suggesting that the *eat-2* mutation, CD and CR may share common mechanisms of lifespan regulation.

The central role of mTORC1, a critical nutrient sensor that is deactivated by glucose and amino acid scarcity, is evident in the aging regulation across diverse species from yeast to mice [25]. Both CR and inhibition of mTORC1 similarly extend lifespan, implying a common underlying mechanism [24]. Autophagy activation is a critical mechanism of lifespan extension, as evidenced by the abatement of lifespan extension in animals with inhibited autophagy during CR [41]. In *C. elegans*, this lifespan enhancement coincides with increased stress tolerance, a benefit attributed to activated autophagy, particularly during food scarcity [52, 53]. Adequate activation of autophagy by Sestrins may underlie the phenomenon of hormesis, the adaptive

response to severe stress following exposure to low-level stress, which could also promote lifespan and healthspan extension [53].

Various sensors activated by different nutrients and stress factors likely modulate autophagy, stress response and longevity. Essential proteins, including Sestrins, may integrate these signals and direct them to mTORC1-regulated autophagy, enabling an adaptive response to changing environments. In mammals, glucose shortage and amino acid deprivation increase *SESN2* expression via a mechanism mediated by ATF4 [4, 54]. Meanwhile, oxidative stress, DNA damage and hypoxia stimulate Sestrins' expression through p53, NRF2 and some other transcription factors [37, 55, 56]. Interestingly, in our studies, *sesn-1* mRNA levels peaked at 10 hours post-CD initiation but declined by 16 hours, suggesting potential post-transcriptional regulation (data not shown). This could be explained by a decoupling of *SESN-1* protein and mRNA expression,

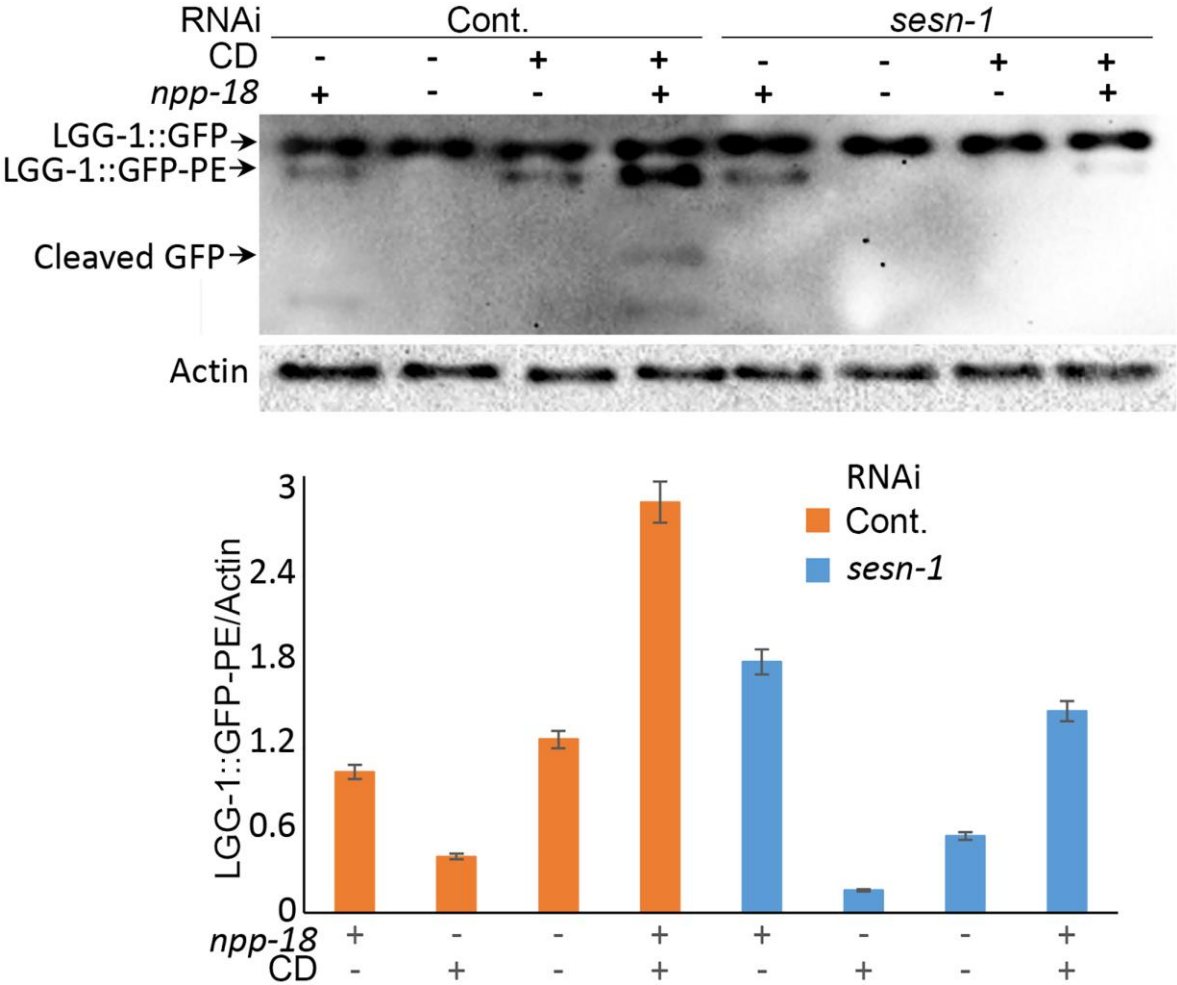

**Figure 5. Autophagy intensity in *C. elegans* is influenced by *sesn-1* and *npp-18*, a component of the GATOR2 complex.** Control *adIs2122* and *adIs2122; sesn-1(RNAi)* nematodes expressing GFP::LGG-1, with or without simultaneous *npp-18* knockdown by RNAi, were subjected to starvation. The relative levels of GFP::LGG-1 conjugation to autophagosomes were measured by immunoblot densitometry. All bar graphs represent blot intensity normalized to actin.

Table 2. Lifespan extension means analysis under CD for *daf-2* (*e1370*), *eat-2* (*ad1116*), *daf-16* (*mu86*) nematodes with *sesn-1* RNAi expression and WT.

| Strain                         | <i>Sesn-1</i> gene status | Ortholog    | Control mean lifespan $\pm$ SEM, days | <i>n</i> | Starvation mean lifespan $\pm$ SEM, days | <i>n</i> | Effect vs. control, % | <i>p</i> -value vs. control |
|--------------------------------|---------------------------|-------------|---------------------------------------|----------|------------------------------------------|----------|-----------------------|-----------------------------|
| WT                             | WT                        |             | 18,2 $\pm$ 0,64                       | 55       | 22,8 $\pm$ 0,39                          | 52       | +25,3                 | <0,0001                     |
| <i>sesn-1(ok3157)</i>          | deletion                  |             | 17,3 $\pm$ 0,56                       | 51       | 18,6 $\pm$ 0,48                          | 55       | +8,7                  | 0,4054                      |
| <i>daf-2</i> ( <i>e1370</i> )  | WT                        | IGF1r       | 31,8 $\pm$ 0,84                       | 53       | 29,9 $\pm$ 0,62                          | 66       | -6,1                  | 0,0252                      |
| <i>daf-2</i> ( <i>e1370</i> )  | RNAi                      | IGF1r       | 23,4 $\pm$ 0,56                       | 52       | 21,4 $\pm$ 0,52                          | 56       | -8,7                  | 0,0219                      |
| <i>eat-2</i> ( <i>ad1116</i> ) | WT                        |             | 20,8 $\pm$ 0,58                       | 59       | 23,1 $\pm$ 0,5                           | 49       | +11,0                 | 0,0057                      |
| <i>eat-2</i> ( <i>ad1116</i> ) | RNAi                      |             | 15,8 $\pm$ 0,41                       | 59       | 16,3 $\pm$ 0,46                          | 64       | +3,6                  | <0,0001                     |
| <i>daf-16</i> ( <i>mu86</i> )  | WT                        | FOXO family | 12,4 $\pm$ 0,41                       | 54       | 13,3 $\pm$ 0,34                          | 53       | +7,5                  | >0,9999                     |
| <i>daf-16</i> ( <i>mu86</i> )  | RNAi                      | FOXO family | 12,2 $\pm$ 0,25                       | 69       | 11,0 $\pm$ 0,22                          | 55       | -9,5                  | 0,7069                      |

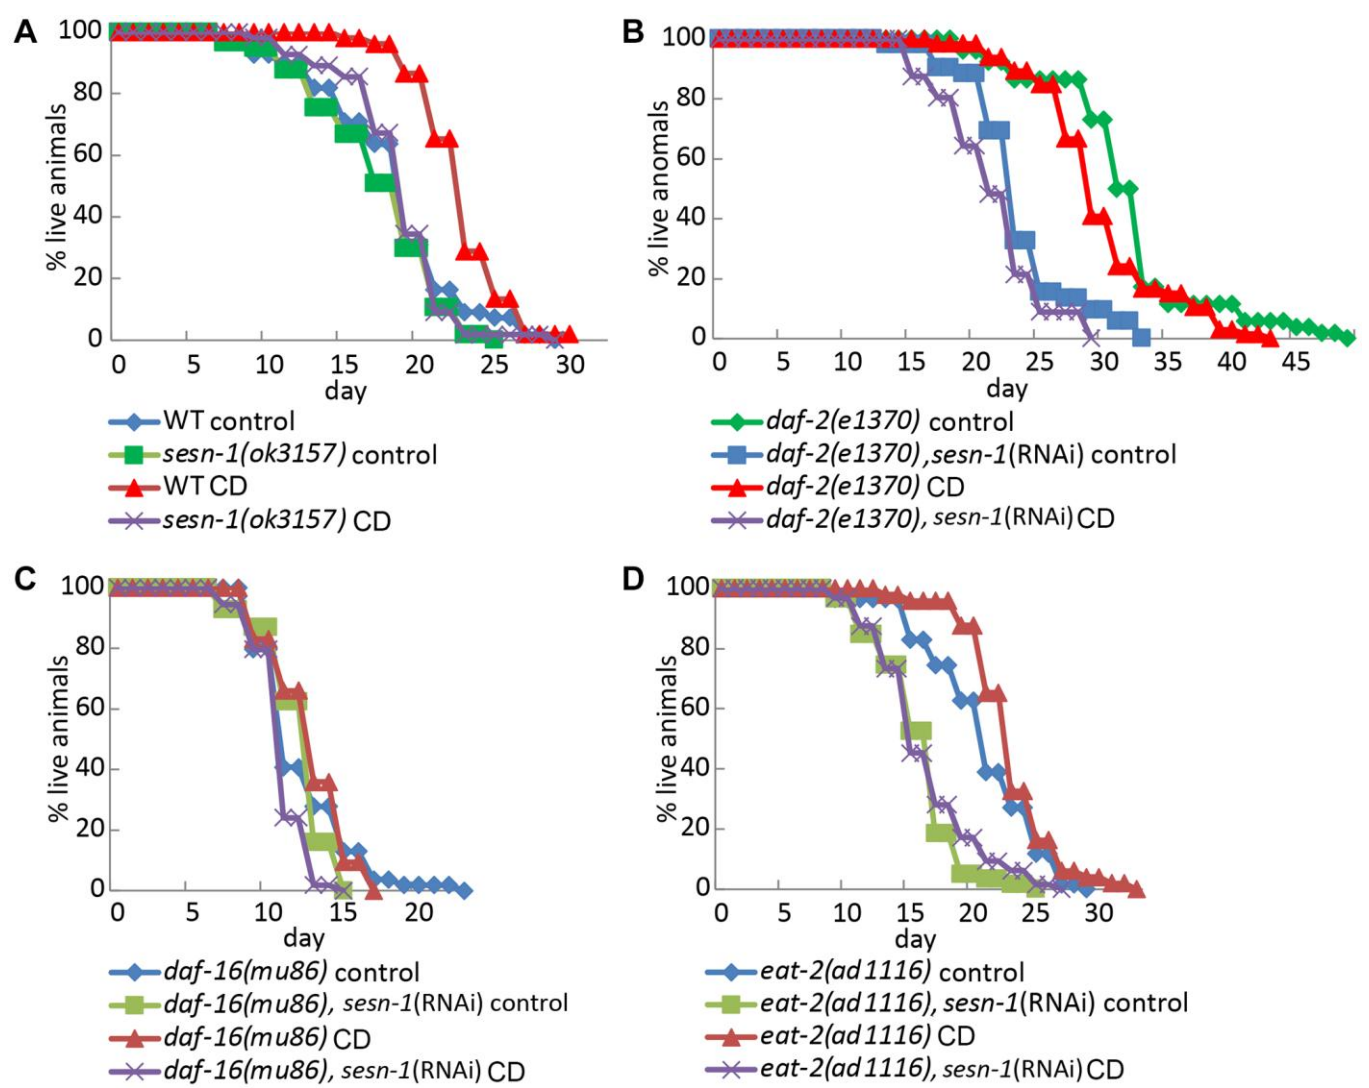

Figure 6. Lifespan regulation by *sesn-1* through the *daf-16* pathway and in *eat-2* mutant under starvation. Analysis of the lifespan of different *C. elegans* strains: (A) WT and *sesn-1(ok3157)*, (B) *daf-2(e1370)*, (C) *daf-16(mu86)* and (D) *eat-2(ad1116)*, with and without *sesn-1(RNAi)*, incubated under control or caloric deprivation (CD) conditions.



with the protein potentially remaining stable despite the reduction in mRNA levels – similar to the dynamics observed for the mammalian SESN2 protein after 24 hours of H<sub>2</sub>O<sub>2</sub> exposure [9]. Such protein stabilization, coupled with its mRNA downregulation during continuous stress, may serve an adaptive function, conserving energy and optimizing recovery when conditions improve. Deletion of *sesn-1* significantly attenuated CD-induced lifespan extension, highlighting its critical role in this process (Figure 1) [35, 57]. The slight extension observed in *sesn-1*-null animals subjected to CD might arise from Sestrin-independent nutrient sensing effects of other unidentified pathways.

Given autophagy's strong links to longevity and stress mitigation [44], we investigated *sesn-1*'s involvement in regulating autophagy and its key effector, mTORC1 [41, 51], in the context of CD. Our findings demonstrate that *sesn-1* mediates mTORC1 suppression and autophagy activation during food scarcity, potentially driving lifespan extension and stress resilience (Figures 1 and 2A–2C). Failure of *sesn-1* (*RNAi*) worms to activate autophagy properly in response to starvation (Figure 3B) and activate autophagosome formation at the appropriate level in response to chloroquine exposure (Supplementary Figure 2) indicates a remarkable role of *sesn-1* in this process. RNA-interference experiments (Figure 6B and Table 2) further support *sesn-1*'s upstream role in the TORC1 pathway. Our studies (Figure 6C and Table 2) also suggest a possible interconnection between *sesn-1* and the *daf-16*(*FOXO*) transcription factor, independent of the insulin/*IGF* pathway. However, these studies should be interpreted with caution and require further evaluation.

Many of Sestrin's functions appear to be mediated through its interactions with GATOR2. Our study showed that GATOR2-deficient worms failed to exhibit *sesn-1*-driven lifespan extension during CD, indicating GATOR2's essential role in this pathway (Figure 4A, 4B and Table 1). Thus, Sestrins may primarily exert their lifespan-regulating and stress-protective effects through modulation of mTORC1 activity and autophagy. This proposition aligns with the studies in *D. melanogaster*, underscoring the interplay between BCAAs deprivation, *dSesn*, mTORC1 and autophagy [37]. BCAAs restriction has also been noted to improve metabolic health in humans [58].

Future endeavours targeting *sesn-1* deactivation in diverse cell types could shed light on its nuanced roles in regulating longevity and stress response. Elucidating the beneficial role of *sesn-1* in nematode lifespan extension has important implications for developing strategies to enhance lifespan and healthspan in humans,

given the evolutionary conservation of Sestrins across metazoan species. Targeting Sestrins could pave the way for therapeutic interventions that mimic CR benefits, offering promising strategies for mitigating age-associated diseases and delaying aging.

## MATERIALS AND METHODS

### Strains of *C. elegans* and their maintenance conditions

Strains sourced from the Caenorhabditis Genetics Center (CGC) included: *C. elegans* Bristol N2 WT strain, RB2325 *sesn-1(ok3157)*I with deletion of 535bp in exon 3 of the *sesn-1* gene, DA2126 (*adls2122* (*lgl-1p::GFP::LGG-1 + rol-6(su1006)*), PD4251(*ccls4251*)I, *e1282 IV* (*myo-3p::GFP::LacZ::NLS + myo-3p::mitochondrial GFP + dpy-20(+)*), CB1370 *daf-2(e1370)*III, DA1116 *eat-2(ad1116)*II, CF1038 *daf-16(mu86)*I, *E. coli* OP50 and HT115(DE3) strains. Additionally, IE24589 *sesn-1(ie24589)*, with an MOS-1 transposon insertion in exon 3 of the *sesn-1* gene, was kindly provided by Yohann Duverger, Universite Lyon. All strains underwent 8 outcrossing against the Bristol N2 WT strain to mitigate off-target mutations as outlined previously [59]. The *C. elegans* strains were maintained, synchronous culture was obtained and experiments were performed under standard conditions at 20°C [60].

### RNAi-expressing plasmid construction

RNA interference in *C. elegans* is a method to silence genes by introducing double-stranded RNA, which triggers degradation of a specific endogenous mRNA, effectively inactivating a target gene [61]. Total nematode RNA was extracted using Reagent ExtractRNA (Eurogen, Moscow, Russia) per manufacturer guidelines. Using reverse transcriptase Mint (Eurogen, Moscow, Russia), cDNA was synthesized and the subsequent cDNA fragments were PCR-amplified. The PCR primer pairs are shown in Table 3. The L4440 vector (Addgene, Watertown, MA, USA) was ligated with the respective cDNA fragments at XbaI and BamHI sites to create the RNAi-expressing constructs. Empty vector was used as control.

### Bacteria-fed RNAi

Briefly, the transformed HT115 strain was grown in LB medium containing tetracycline (12.5 µg/ml) and ampicillin (100 µg/ml) at 37°C with shaking [62]. The bacteria were then plated on ampicillin-containing agarose plates supplemented with 1 mM IPTG and incubated at room temperature for two days. L1 *C. elegans* were added the following day. For double RNAi experiments, plates were prepared in a similar

**Table 3. Primer sequences for *C. elegans* candidate genes.**

| Gene             | Type | Sequence                              |
|------------------|------|---------------------------------------|
| <i>sesn-1</i>    | F    | 5'-agagagtctagaacatgcacactac-3'       |
|                  | R    | 5'-agagaggatcctcaatccaaagcctt-3'      |
| <i>npp-18</i>    | F    | 5'-agatctagagccagcgatatgacaatggcg-3'  |
|                  | R    | 5'-attggatcctcgggcatggtagatcgaagac-3' |
| <i>Y32H12A.8</i> | F    | 5'-agatctagacgatctcatcgaaggtccatcg-3' |
|                  | R    | 5'-ataggatccccaccacgtgtggcaataagc-3'  |

Abbreviations: F: Forward Prime; R: Reverse Primer.

**Table 4. Primer sequences for RNAi qPCR validation.**

| Gene             | Type | Sequence                        |
|------------------|------|---------------------------------|
| <i>sesn-1</i>    | F    | 5'-tccgtgaagcaatttggaaac-3'     |
|                  | R    | 5'-tcgctaccatcattaccacg-3'      |
| <i>npp-18</i>    | F    | 5'-ttggcgcggtatttgggctc-3'      |
|                  | R    | 5'-gttcttcggatccattgggattct-3'  |
| <i>Y32H12A.8</i> | F    | 5'-ccacgacgtcgtcaaacgg-3'       |
|                  | R    | 5'-gttgcatgccaatcgaggc-3'       |
| <i>top-1</i>     | F    | 5'-ggcccagaagaagtacgacagactg-3' |
|                  | R    | 5'-tcgatggcccaacggaatttc-3'     |

Abbreviations: F: Forward Prime; R: Reverse Primer.

manner except that the 1:1 mixture of both RNAi bacterial clones was seeded into the plates.

#### qPCR analysis of mRNA

Synchronized L1 nematodes were placed on bacteria-laden NGM plates. L3 worms were rinsed off the plates with M9, then cleansed three times with PBS. After washing the worms with PBS, they were suspended in the 0.1% Tween-20–PBS solution for 20 minutes to eliminate gut bacteria. The worms were snap-frozen in liquid nitrogen and RNA extraction was conducted using Reagent ExtractRNA (Eurogen, Moscow, Russia). A NanoDrop (Thermo Fisher Scientific Inc, Waltham, MA, USA) was used to determine RNA concentrations and the reverse transcription Mint Kit (Eurogen, Moscow, Russia) was utilized to synthesize cDNA from 3 µg of total RNA. mRNA levels were analyzed using the CFX96 (Bio-Rad Laboratories, Hercules, CA, USA) with qPCRmix-HS SYBR (Eurogen, Moscow, Russia) and assessed using the Bio-Rad CFX Manager software (Bio-Rad Laboratories, Hercules, CA, USA) (Supplementary Figure 3). Topoisomerase I (*top-1*) mRNA was used as a reference mRNA. The qPCR primer pairs listed in Table 4.

#### Lifespan analysis during CD

Synchronized L1 nematodes were plated on either RNAi plates or empty vector control plates. Upon

reaching L4, worms were transferred to RNAi plates, empty vector control plates or plates lacking bactopectone and bacteria. Viability was assessed daily according to the established protocols [39, 40]. Worms that disappeared or dried on the plate wall were excluded from the analysis.

#### M9 media, paraquat and hydrogen peroxide survival analysis

To analyze viability in M9 media, L1 nematodes were introduced to 6 cm Petri plates with a thin M9 layer and kept in a 20°C incubator with gentle shaking. Daily aliquots were plated on NGM to count live nematodes. For paraquat and hydrogen peroxide treatments, L4 nematodes were added to 24-well plates containing thin layers of M9 media enriched with either 300 µM paraquat or 4 mM hydrogen peroxide. Viability was determined as previously described.

#### Fluorescent microscopy analysis of autophagy and muscle degeneration

Autophagosomes in seam cells of the *adls2122* strain, expressing the LGG-1::GFP fusion protein, were quantified in both wild-type and *sesn-1*(RNAi) L3 animals using a Leica DMI4000B inverted microscope (Leica Microsystems, Wetzlar, Germany) at 640×

magnification, as previously described [63, 64]. The number of myocyte nuclei labelled with GFP in *ccIs4251* strain, which expresses a myo-3 promoter driving a nuclear-targeted GFP-LacZ fusion and myo-3 promoter driving mitochondrially targeted GFP, was analyzed in the same manner for worms at the L4 stage and at the 5-day-old adult stage.

### Immunoblotting

Normalized nematode lysates containing 10 mg of protein per sample were subjected to 15% PAGE, as previously described [63–65]. The primary antibodies used for these studies were: anti-GFP (#11814460001, Roche Pharma, Penzberg, Germany), anti-phospho-ribosomal protein S6 (#sc-54279, Santa Cruz Biotechnology, Dallas, TX, USA) and anti-actin (#sc-47778, Santa Cruz Biotechnology, Dallas, TX, USA). The specificity of the anti-phospho-ribosomal protein S6 antibody was confirmed using a blocking peptide (#sc-54279 P, Santa Cruz Biotechnology, Dallas, TX, USA), adhering to the provided protocol. Blot images were acquired using the ChemiDoc Imaging System (Bio-Rad Laboratories, Hercules, CA, USA).

### Statistical analysis

Statistical analyses were performed using GraphPad Prism 10 software (GraphPad Software, Boston, MA, USA). One-way ANOVA with Bonferroni correction ( $p < 0.05$ ) for multiple comparisons was used to assess the statistical significance of differences in mean lifespan across groups in all survival experiments. Lifespan tables show the  $p$ -value used to compare the studied groups with their controls. For autophagy and muscle degeneration analyses, Student's unpaired two-tailed  $t$ -test was performed to compare the experimental groups with their respective controls. ns, \*, \*\* and \*\*\* correspond to  $p$ -values  $> 0.05$ ,  $< 0.05$ ,  $< 0.01$  and  $< 0.001$ , respectively.

### Abbreviations

*C. elegans*: *Caenorhabditis elegans*; *D. melanogaster*: *Drosophila melanogaster*; CGC: *Caenorhabditis* Genetics Center; CD: caloric deprivation; CR: caloric restriction; *E. coli*: *Escherichia coli*; EV: empty vector; *IGFR*: Insulin-like growth factor receptor; NGM: Nematode growth medium; RNAi: RNA Interference; WT: wild-type; L1, L3 and L4: first, third and fourth larval stages of *C. elegans*, respectively.

### AUTHOR CONTRIBUTIONS

AOZ performed all studies, PMC and AVB designed the experiments and wrote the paper.

### ACKNOWLEDGMENTS

We thank Yohann Duverger, Universite Lyon, for the generous gift of IE24589 *Sesn-1* deficient strain and Nadusha Pryadilova and Alex Haidurov for help with the manuscript.

### CONFLICTS OF INTEREST

The authors declare no conflicts of interest related to this study.

### FUNDING

The work was supported by Grant 17-14-01420 and 23-14-00370 from the Russian Science Foundation, the Wellcome Trust ISSF grant and Trinity St. James's Cancer Institute Cancer Research Stimulus Award (TSJCI Crest Award) to AVB, grant 075-15-2019-1660 from the Russian Federal Research Program for Genetic Technologies Development to PMC.

### REFERENCES

1. Velasco-Miguel S, Buckbinder L, Jean P, Gelbert L, Talbott R, Laidlaw J, Seizinger B, Kley N. PA26, a novel target of the p53 tumor suppressor and member of the GADD family of DNA damage and growth arrest inducible genes. *Oncogene*. 1999; 18:127–37. <https://doi.org/10.1038/sj.onc.1202274> PMID:9926927
2. Budanov AV, Shoshani T, Faerman A, Zelin E, Kamer I, Kalinski H, Gorodin S, Fishman A, Chajut A, Einat P, Skalter R, Gudkov AV, Chumakov PM, Feinstein E. Identification of a novel stress-responsive gene Hi95 involved in regulation of cell viability. *Oncogene*. 2002; 21:6017–31. <https://doi.org/10.1038/sj.onc.1205877> PMID:12203114
3. Peeters H, Debeer P, Bairoch A, Wilquet V, Huysmans C, Parthoens E, Fryns JP, Gewillig M, Nakamura Y, Niikawa N, Van de Ven W, Devriendt K. PA26 is a candidate gene for heterotaxia in humans: identification of a novel PA26-related gene family in human and mouse. *Hum Genet*. 2003; 112:573–80. <https://doi.org/10.1007/s00439-003-0917-5> PMID:12607115
4. Ding B, Parmigiani A, Divakaruni AS, Archer K, Murphy AN, Budanov AV. Sestrin2 is induced by glucose starvation via the unfolded protein response and protects cells from non-canonical necroptotic cell death. *Sci Rep*. 2016; 6:22538. <https://doi.org/10.1038/srep22538> PMID:26932729

5. Dalina AA, Kovaleva IE, Budanov AV. [Sestrins are Gatekeepers in the Way from Stress to Aging and Disease]. *Mol Biol (Mosk)*. 2018; 52:948–62.  
<https://doi.org/10.1134/S0026898418060046>  
PMID: [30633238](https://pubmed.ncbi.nlm.nih.gov/30633238/)
6. Parmigiani A, Budanov AV. Sensing the Environment Through Sestrins: Implications for Cellular Metabolism. *Int Rev Cell Mol Biol*. 2016; 327:1–42.  
<https://doi.org/10.1016/bs.ircmb.2016.05.003>  
PMID: [27692174](https://pubmed.ncbi.nlm.nih.gov/27692174/)
7. Haidurov A, Budanov AV. Locked in Structure: Sestrin and GATOR-A Billion-Year Marriage. *Cells*. 2024; 13:1587.  
<https://doi.org/10.3390/cells13181587>  
PMID: [39329768](https://pubmed.ncbi.nlm.nih.gov/39329768/)
8. Lee JH, Budanov AV, Park EJ, Birse R, Kim TE, Perkins GA, Ocorr K, Ellisman MH, Bodmer R, Bier E, Karin M. Sestrin as a feedback inhibitor of TOR that prevents age-related pathologies. *Science*. 2010; 327:1223–8.  
<https://doi.org/10.1126/science.1182228>  
PMID: [20203043](https://pubmed.ncbi.nlm.nih.gov/20203043/)
9. Budanov AV, Sablina AA, Feinstein E, Koonin EV, Chumakov PM. Regeneration of peroxiredoxins by p53-regulated sestrins, homologs of bacterial AhpD. *Science*. 2004; 304:596–600.  
<https://doi.org/10.1126/science.1095569>  
PMID: [15105503](https://pubmed.ncbi.nlm.nih.gov/15105503/)
10. Ding B, Parmigiani A, Yang C, Budanov AV. Sestrin2 facilitates death receptor-induced apoptosis in lung adenocarcinoma cells through regulation of XIAP degradation. *Cell Cycle*. 2015; 14:3231–41.  
<https://doi.org/10.1080/15384101.2015.1084447>  
PMID: [26313705](https://pubmed.ncbi.nlm.nih.gov/26313705/)
11. Ding B, Haidurov A, Chawla A, Parmigiani A, van de Kamp G, Dalina A, Yuan F, Lee JH, Chumakov PM, Grossman SR, Budanov AV. p53-inducible SESTRINs might play opposite roles in the regulation of early and late stages of lung carcinogenesis. *Oncotarget*. 2019; 10:6997–7009.  
<https://doi.org/10.18632/oncotarget.27367>  
PMID: [31857853](https://pubmed.ncbi.nlm.nih.gov/31857853/)
12. Kozak J, Jonak K. Association between the antioxidant properties of SESN proteins and anti-cancer therapies. *Amino Acids*. 2023; 55:835–51.  
<https://doi.org/10.1007/s00726-023-03281-6>  
PMID: [37284849](https://pubmed.ncbi.nlm.nih.gov/37284849/)
13. Haidurov A, Zheltukhin AO, Snezhkina AV, Krasnov GS, Kudryavtseva AV, Budanov AV. p53-regulated SESN1 and SESN2 regulate cell proliferation and cell death through control of STAT3. *Cell Commun Signal*. 2025; 23:105.  
<https://doi.org/10.1186/s12964-025-02104-3>  
PMID: [39985075](https://pubmed.ncbi.nlm.nih.gov/39985075/)
14. Budanov AV, Karin M. p53 target genes sestrin1 and sestrin2 connect genotoxic stress and mTOR signaling. *Cell*. 2008; 134:451–60.  
<https://doi.org/10.1016/j.cell.2008.06.028>  
PMID: [18692468](https://pubmed.ncbi.nlm.nih.gov/18692468/)
15. Lee JH, Budanov AV, Talukdar S, Park EJ, Park HL, Park HW, Bandyopadhyay G, Li N, Aghajan M, Jang I, Wolfe AM, Perkins GA, Ellisman MH, et al. Maintenance of metabolic homeostasis by Sestrin2 and Sestrin3. *Cell Metab*. 2012; 16:311–21.  
<https://doi.org/10.1016/j.cmet.2012.08.004>  
PMID: [22958918](https://pubmed.ncbi.nlm.nih.gov/22958918/)
16. Sablina AA, Budanov AV, Ilyinskaya GV, Agapova LS, Kravchenko JE, Chumakov PM. The antioxidant function of the p53 tumor suppressor. *Nat Med*. 2005; 11:1306–13.  
<https://doi.org/10.1038/nm1320>  
PMID: [16286925](https://pubmed.ncbi.nlm.nih.gov/16286925/)
17. Liu GY, Sabatini DM. mTOR at the nexus of nutrition, growth, ageing and disease. *Nat Rev Mol Cell Biol*. 2020; 21:183–203.  
<https://doi.org/10.1038/s41580-019-0199-y>  
PMID: [31937935](https://pubmed.ncbi.nlm.nih.gov/31937935/)
18. Bialik S, Dasari SK, Kimchi A. Autophagy-dependent cell death - where, how and why a cell eats itself to death. *J Cell Sci*. 2018; 131:jcs215152.  
<https://doi.org/10.1242/jcs.215152>  
PMID: [30237248](https://pubmed.ncbi.nlm.nih.gov/30237248/)
19. Powers RW 3rd, Kaeblerlein M, Caldwell SD, Kennedy BK, Fields S. Extension of chronological life span in yeast by decreased TOR pathway signaling. *Genes Dev*. 2006; 20:174–84.  
<https://doi.org/10.1101/gad.1381406>  
PMID: [16418483](https://pubmed.ncbi.nlm.nih.gov/16418483/)
20. Vellai T, Takacs-Vellai K, Zhang Y, Kovacs AL, Orosz L, Müller F. Genetics: influence of TOR kinase on lifespan in *C. elegans*. *Nature*. 2003; 426:620.  
<https://doi.org/10.1038/426620a>  
PMID: [14668850](https://pubmed.ncbi.nlm.nih.gov/14668850/)
21. Kapahi P, Zid BM, Harper T, Koslover D, Sapin V, Benzer S. Regulation of lifespan in *Drosophila* by modulation of genes in the TOR signaling pathway. *Curr Biol*. 2004; 14:885–90.  
<https://doi.org/10.1016/j.cub.2004.03.059>  
PMID: [15186745](https://pubmed.ncbi.nlm.nih.gov/15186745/)
22. Harrison DE, Strong R, Sharp ZD, Nelson JF, Astle CM, Flurkey K, Nadon NL, Wilkinson JE, Frenkel K, Carter CS, Pahor M, Javors MA, Fernandez E, Miller RA. Rapamycin fed late in life extends lifespan in genetically heterogeneous mice. *Nature*. 2009; 460:392–5.



- <https://doi.org/10.1038/nature08221>  
PMID:19587680
23. Lyu YX, Fu Q, Wilczok D, Ying K, King A, Antebi A, Vojta A, Stolzing A, Moskalev A, Georgievskaya A, Maier AB, Olsen A, Groth A, et al. Longevity biotechnology: bridging AI, biomarkers, geroscience and clinical applications for healthy longevity. *Aging (Albany NY)*. 2024; 16:12955–76.  
<https://doi.org/10.18632/aging.206135>  
PMID:39418098
  24. Hansen M, Taubert S, Crawford D, Libina N, Lee SJ, Kenyon C. Lifespan extension by conditions that inhibit translation in *Caenorhabditis elegans*. *Aging Cell*. 2007; 6:95–110.  
<https://doi.org/10.1111/j.1474-9726.2006.00267.x>  
PMID:17266679
  25. Johnson SC, Rabinovitch PS, Kaeberlein M. mTOR is a key modulator of ageing and age-related disease. *Nature*. 2013; 493:338–45.  
<https://doi.org/10.1038/nature11861>  
PMID:23325216
  26. Pan H, Finkel T. Key proteins and pathways that regulate lifespan. *J Biol Chem*. 2017; 292:6452–60.  
<https://doi.org/10.1074/jbc.R116.771915>  
PMID:28264931
  27. Murphy CT, Hu PJ. Insulin/insulin-like growth factor signaling in *C. elegans*. *WormBook*. 2013; 1–43.  
<https://doi.org/10.1895/wormbook.1.164.1>  
PMID:24395814
  28. Gross DN, van den Heuvel AP, Birnbaum MJ. The role of FoxO in the regulation of metabolism. *Oncogene*. 2008; 27:2320–36.  
<https://doi.org/10.1038/onc.2008.25>  
PMID:18391974
  29. Zaarur N, Desevin K, Mackenzie J, Lord A, Grishok A, Kandror KV. ATGL-1 mediates the effect of dietary restriction and the insulin/IGF-1 signaling pathway on longevity in *C. elegans*. *Mol Metab*. 2019; 27:75–82.  
<https://doi.org/10.1016/j.molmet.2019.07.001>  
PMID:31311719
  30. Huayta J, Crapster JP, San-Miguel A. Endogenous DAF-16 spatiotemporal activity quantitatively predicts lifespan extension induced by dietary restriction. *Commun Biol*. 2023; 6:203.  
<https://doi.org/10.1038/s42003-023-04562-2>  
PMID:36807646
  31. Saxton RA, Sabatini DM. mTOR Signaling in Growth, Metabolism, and Disease. *Cell*. 2017; 168:960–76.  
<https://doi.org/10.1016/j.cell.2017.02.004>  
PMID:28283069
  32. Parmigiani A, Nourbakhsh A, Ding B, Wang W, Kim YC, Akopiants K, Guan KL, Karin M, Budanov AV. Sestrins inhibit mTORC1 kinase activation through the GATOR complex. *Cell Rep*. 2014; 9:1281–91.  
<https://doi.org/10.1016/j.celrep.2014.10.019>  
PMID:25457612
  33. Chantranupong L, Wolfson RL, Orozco JM, Saxton RA, Scaria SM, Bar-Peled L, Spooner E, Isasa M, Gygi SP, Sabatini DM. The Sestrins interact with GATOR2 to negatively regulate the amino-acid-sensing pathway upstream of mTORC1. *Cell Rep*. 2014; 9:1–8.  
<https://doi.org/10.1016/j.celrep.2014.09.014>  
PMID:25263562
  34. Yang YL, Loh KS, Liou BY, Chu IH, Kuo CJ, Chen HD, Chen CS. SESN-1 is a positive regulator of lifespan in *Caenorhabditis elegans*. *Exp Gerontol*. 2013; 48:371–9.  
<https://doi.org/10.1016/j.exger.2012.12.011>  
PMID:23318476
  35. Zheltukhin AO, Ilyinskaya GV, Budanov AV, Chumakov PM. Some Phenotypic Characteristics of Nematode *Caenorhabditis Elegans* Strains with Defective Functions of the Sestrin (cSesn) Gene. *Biomed Pharmacol J*. 2018; 11:759–67.  
<https://dx.doi.org/10.13005/bpj/1430>
  36. Juricic P, Grönke S, Partridge L. Branched-Chain Amino Acids Have Equivalent Effects to Other Essential Amino Acids on Lifespan and Aging-Related Traits in *Drosophila*. *J Gerontol A Biol Sci Med Sci*. 2020; 75:24–31.  
<https://doi.org/10.1093/gerona/glz080>  
PMID:30891588
  37. Lu J, Temp U, Müller-Hartmann A, Esser J, Grönke S, Partridge L. Sestrin is a key regulator of stem cell function and lifespan in response to dietary amino acids. *Nat Aging*. 2021; 1:60–72.  
<https://doi.org/10.1038/s43587-020-00001-7>  
PMID:37117991
  38. Haidurov A, Budanov AV. Sestrin family - the stem controlling healthy ageing. *Mech Ageing Dev*. 2020; 192:111379.  
<https://doi.org/10.1016/j.mad.2020.111379>  
PMID:33022334
  39. Lee GD, Wilson MA, Zhu M, Wolkow CA, de Cabo R, Ingram DK, Zou S. Dietary deprivation extends lifespan in *Caenorhabditis elegans*. *Aging Cell*. 2006; 5:515–24.  
<https://doi.org/10.1111/j.1474-9726.2006.00241.x>  
PMID:17096674
  40. Kaeberlein TL, Smith ED, Tsuchiya M, Welton KL, Thomas JH, Fields S, Kennedy BK, Kaeberlein M.

- Lifespan extension in *Caenorhabditis elegans* by complete removal of food. *Aging Cell*. 2006; 5:487–94.  
<https://doi.org/10.1111/j.1474-9726.2006.00238.x>  
PMID:17081160
41. Hansen M, Chandra A, Mitic LL, Onken B, Driscoll M, Kenyon C. A role for autophagy in the extension of lifespan by dietary restriction in *C. elegans*. *PLoS Genet*. 2008; 4:e24.  
<https://doi.org/10.1371/journal.pgen.0040024>  
PMID:18282106
  42. Jia K, Chen D, Riddle DL. The TOR pathway interacts with the insulin signaling pathway to regulate *C. elegans* larval development, metabolism and life span. *Development*. 2004; 131:3897–906.  
<https://doi.org/10.1242/dev.01255>  
PMID:15253933
  43. Lakowski B, Hekimi S. The genetics of caloric restriction in *Caenorhabditis elegans*. *Proc Natl Acad Sci U S A*. 1998; 95:13091–6.  
<https://doi.org/10.1073/pnas.95.22.13091>  
PMID:9789046
  44. Mizushima N. Autophagy: process and function. *Genes Dev*. 2007; 21:2861–73.  
<https://doi.org/10.1101/gad.1599207>  
PMID:18006683
  45. Li Y, Tian X, Luo J, Bao T, Wang S, Wu X. Molecular mechanisms of aging and anti-aging strategies. *Cell Commun Signal*. 2024; 22:285.  
<https://doi.org/10.1186/s12964-024-01663-1>  
PMID:38790068
  46. Palmisano NJ, Meléndez A. Detection of Autophagy in *Caenorhabditis elegans* Using GFP::LGG-1 as an Autophagy Marker. *Cold Spring Harb Protoc*. 2016; 2016:pdb.prot086496.  
<https://doi.org/10.1101/pdb.prot086496>  
PMID:26729905
  47. Klionsky DJ, Abdelmohsen K, Abe A, Abedin MJ, Abeliovich H, Acevedo Arozena A, Adachi H, Adams CM, Adams PD, Adeli K, Adihetty PJ, Adler SG, Agam G, et al. Guidelines for the use and interpretation of assays for monitoring autophagy (3rd edition). *Autophagy*. 2016; 12:1–222.  
<https://doi.org/10.1080/15548627.2015.1100356>  
PMID:26799652
  48. Baxi K, Ghavidel A, Waddell B, Harkness TA, de Carvalho CE. Regulation of Lysosomal Function by the DAF-16 Forkhead Transcription Factor Couples Reproduction to Aging in *Caenorhabditis elegans*. *Genetics*. 2017; 207:83–101.  
<https://doi.org/10.1534/genetics.117.204222>  
PMID:28696216
  49. Segalés J, Perdiguero E, Serrano AL, Sousa-Victor P, Ortet L, Jardí M, Budanov AV, Garcia-Prat L, Sandri M, Thomson DM, Karin M, Hee Lee J, Muñoz-Cánoves P. Sestrin prevents atrophy of disused and aging muscles by integrating anabolic and catabolic signals. *Nat Commun*. 2020; 11:189.  
<https://doi.org/10.1038/s41467-019-13832-9>  
PMID:31929511
  50. Budanov AV. SESTRINs regulate mTORC1 via RAGs: The riddle of GATOR. *Mol Cell Oncol*. 2015; 2:e997113.  
<https://doi.org/10.1080/23723556.2014.997113>  
PMID:27308486
  51. Zhou B, Kreuzer J, Kumsta C, Wu L, Kamer KJ, Cedillo L, Zhang Y, Li S, Kacergis MC, Webster CM, Fejes-Toth G, Naray-Fejes-Toth A, Das S, et al. Mitochondrial Permeability Uncouples Elevated Autophagy and Lifespan Extension. *Cell*. 2019; 177:299–314.e16.  
<https://doi.org/10.1016/j.cell.2019.02.013>  
PMID:30929899
  52. Kang C, You YJ, Avery L. Dual roles of autophagy in the survival of *Caenorhabditis elegans* during starvation. *Genes Dev*. 2007; 21:2161–71.  
<https://doi.org/10.1101/gad.1573107>  
PMID:17785524
  53. Kumsta C, Hansen M. Hormetic heat shock and HSF-1 overexpression improve *C. elegans* survival and proteostasis by inducing autophagy. *Autophagy*. 2017; 13:1076–7.  
<https://doi.org/10.1080/15548627.2017.1299313>  
PMID:28333578
  54. Ye J, Palm W, Peng M, King B, Lindsten T, Li MO, Koumenis C, Thompson CB. GCN2 sustains mTORC1 suppression upon amino acid deprivation by inducing Sestrin2. *Genes Dev*. 2015; 29:2331–6.  
<https://doi.org/10.1101/gad.269324.115>  
PMID:26543160
  55. Wolfson RL, Chantranupong L, Saxton RA, Shen K, Scaria SM, Cantor JR, Sabatini DM. Sestrin2 is a leucine sensor for the mTORC1 pathway. *Science*. 2016; 351:43–8.  
<https://doi.org/10.1126/science.aab2674>  
PMID:26449471
  56. Kimball SR, Gordon BS, Moyer JE, Dennis MD, Jefferson LS. Leucine induced dephosphorylation of Sestrin2 promotes mTORC1 activation. *Cell Signal*. 2016; 28:896–906.  
<https://doi.org/10.1016/j.cellsig.2016.03.008>  
PMID:27010498
  57. Kovaleva IE, Tokarchuk AV, Zheltukhin AO, Dalina AA, Safronov GG, Evstafieva AG, Lyamzaev KG, Chumakov PM, Budanov AV. Mitochondrial localization of SESN2. *PLoS One*. 2020; 15:e0226862.

- <https://doi.org/10.1371/journal.pone.0226862>  
PMID:[32287270](https://pubmed.ncbi.nlm.nih.gov/32287270/)
58. Fontana L, Cummings NE, Arriola Apelo SI, Neuman JC, Kasza I, Schmidt BA, Cava E, Spelta F, Tosti V, Syed FA, Baar EL, Veronese N, Cottrell SE, et al. Decreased Consumption of Branched-Chain Amino Acids Improves Metabolic Health. *Cell Rep.* 2016; 16:520–30.  
<https://doi.org/10.1016/j.celrep.2016.05.092>  
PMID:[27346343](https://pubmed.ncbi.nlm.nih.gov/27346343/)
59. Wang D, Cao M, Dinh J, Dong Y. Methods for creating mutations in *C. elegans* that extend lifespan. *Methods Mol Biol.* 2013; 1048:65–75.  
[https://doi.org/10.1007/978-1-62703-556-9\\_6](https://doi.org/10.1007/978-1-62703-556-9_6)  
PMID:[23929098](https://pubmed.ncbi.nlm.nih.gov/23929098/)
60. Stiernagle T. Maintenance of *C. elegans*. *WormBook.* 2006; 1–11.  
<https://doi.org/10.1895/wormbook.1.101.1>  
PMID:[18050451](https://pubmed.ncbi.nlm.nih.gov/18050451/)
61. Conte D Jr, MacNeil LT, Walhout AJM, Mello CC. RNA Interference in *Caenorhabditis elegans*. *Curr Protoc Mol Biol.* 2015; 109:26.3.1–26.3.30.  
<https://doi.org/10.1002/0471142727.mb2603s109>  
PMID:[25559107](https://pubmed.ncbi.nlm.nih.gov/25559107/)
62. Timmons L, Court DL, Fire A. Ingestion of bacterially expressed dsRNAs can produce specific and potent genetic interference in *Caenorhabditis elegans*. *Gene.* 2001; 263:103–12.  
[https://doi.org/10.1016/s0378-1119\(00\)00579-5](https://doi.org/10.1016/s0378-1119(00)00579-5)  
PMID:[11223248](https://pubmed.ncbi.nlm.nih.gov/11223248/)
63. Palmisano NJ, Meléndez A. Detection of Autophagy in *Caenorhabditis elegans* by Western Blotting Analysis of LGG-1. *Cold Spring Harb Protoc.* 2016; 2016.pdb.prot086512.  
<https://doi.org/10.1101/pdb.prot086512>  
PMID:[26832685](https://pubmed.ncbi.nlm.nih.gov/26832685/)
64. Meléndez A, Tallóczy Z, Seaman M, Eskelinen EL, Hall DH, Levine B. Autophagy genes are essential for dauer development and life-span extension in *C. elegans*. *Science.* 2003; 301:1387–91.  
<https://doi.org/10.1126/science.1087782>  
PMID:[12958363](https://pubmed.ncbi.nlm.nih.gov/12958363/)
65. Djeddi A, Michelet X, Culetto E, Alberti A, Barois N, Legouis R. Induction of autophagy in ESCRT mutants is an adaptive response for cell survival in *C. elegans*. *J Cell Sci.* 2012; 125:685–94.  
<https://doi.org/10.1242/jcs.091702>  
PMID:[22389403](https://pubmed.ncbi.nlm.nih.gov/22389403/)

## SUPPLEMENTARY MATERIALS

### Supplementary Figures

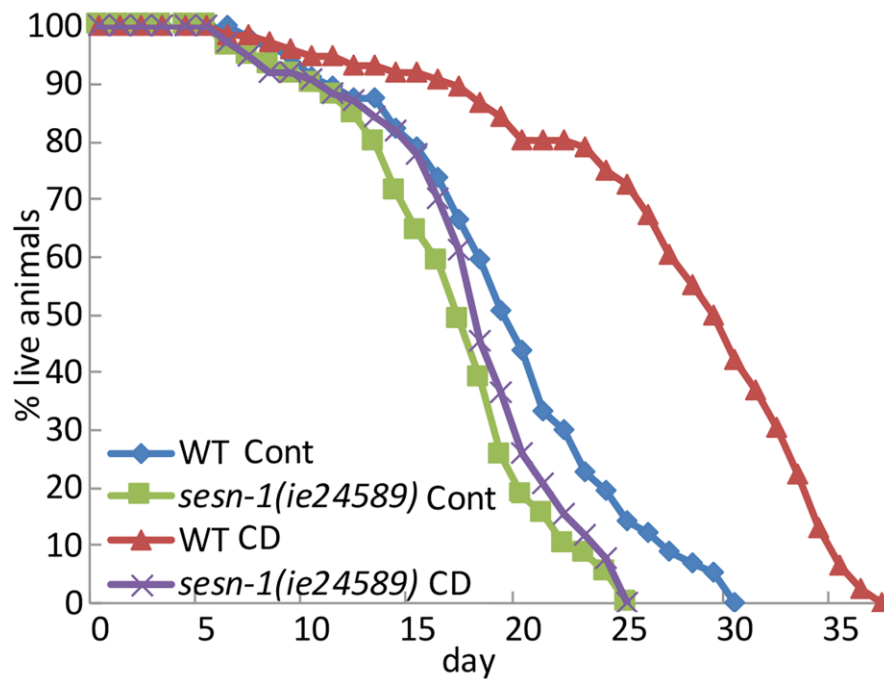

**Supplementary Figure 1. *C. elegans* lifespan extension under CD is modulated by *sesn-1*.** The lifespan of WT and *sesn-1(ie24589)* strain nematodes was assessed after plating animals on control ( $n = 57$  WT,  $n = 57$  *sesn-1(ie24589)*) or axenic media ( $n = 76$  WT,  $n = 77$  *sesn-1(ie24589)*). The mean life expectancy of WT was  $19.9 \pm 0.74$  days in control conditions and  $27.9 \pm 0.82$  days in starvation conditions,  $p > 0.001$ . The mean lifespan of *sesn-1(ie24589)* was  $17.2 \pm 0.59$  days in control conditions and  $18.1 \pm 0.53$  days in starvation conditions,  $p < 0.05$ .



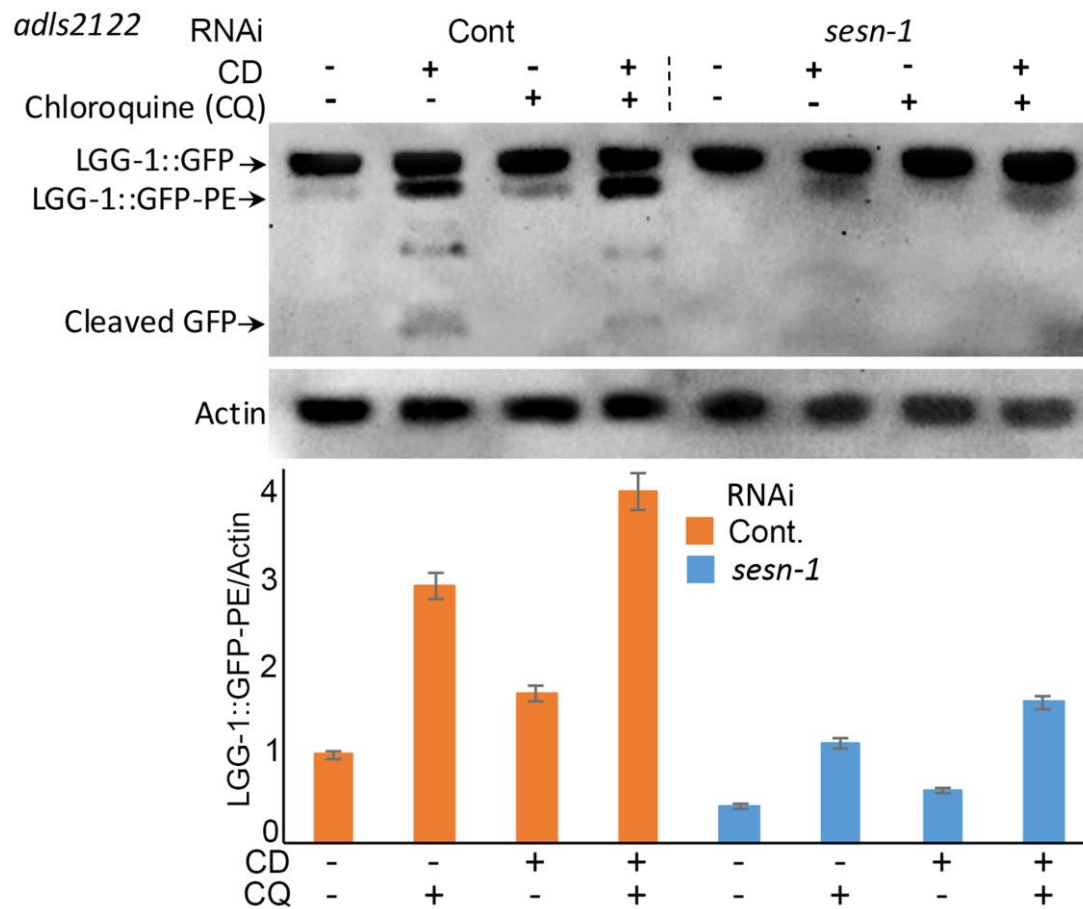

**Supplementary Figure 2. Chloroquine treatment leads to increased autophagosome accumulation in *C. elegans* in a *sesn-1*-dependent manner.** Control *adls2122* and *adls2122; sesn-1(RNAi)* nematodes were initially exposed to chloroquine and then shifted to CD conditions. The autophagosomal fraction of GFP::LGG-1 was assessed using immunoblot densitometry. All bar graphs represent blot intensity normalized to actin.

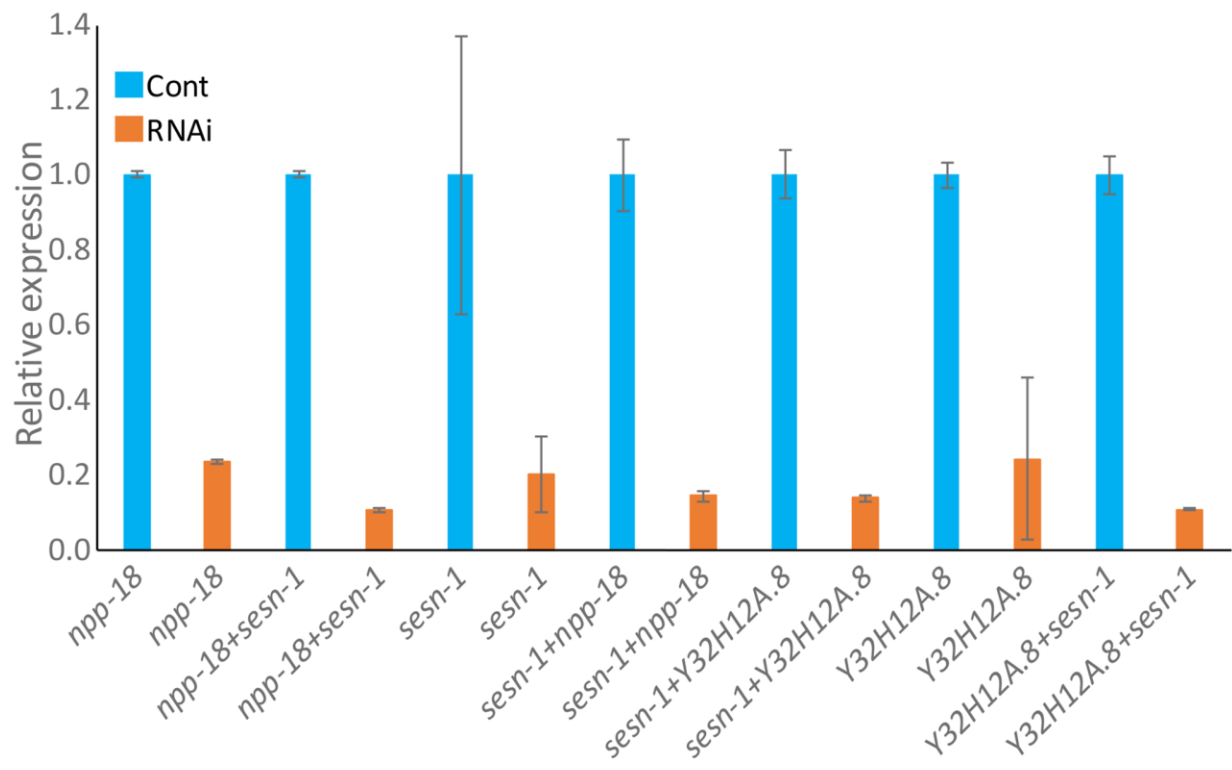

**Supplementary Figure 3. qPCR validation of RNA interference targeting *sesn-1*, *npp-18*, and *Y32H12A.8* in WT and *sesn-1(ok3157)* nematodes.** All bar graphs represent relative gene expression normalized to the *top-1* mRNA.
